# Supplementary material for: Clinical and Molecular Characterization of Classical-Like Ehlers-Danlos Syndrome Due to a Novel TNXB Variant
Source: MDPI journal article supplement (doi:10.3390/genes10110843), 2019-10-25
Supplement: s1 [file s1]

Supplementary data

Supplementary Figure S1: Steady-state analysis of collagen in the medium and the cell layer

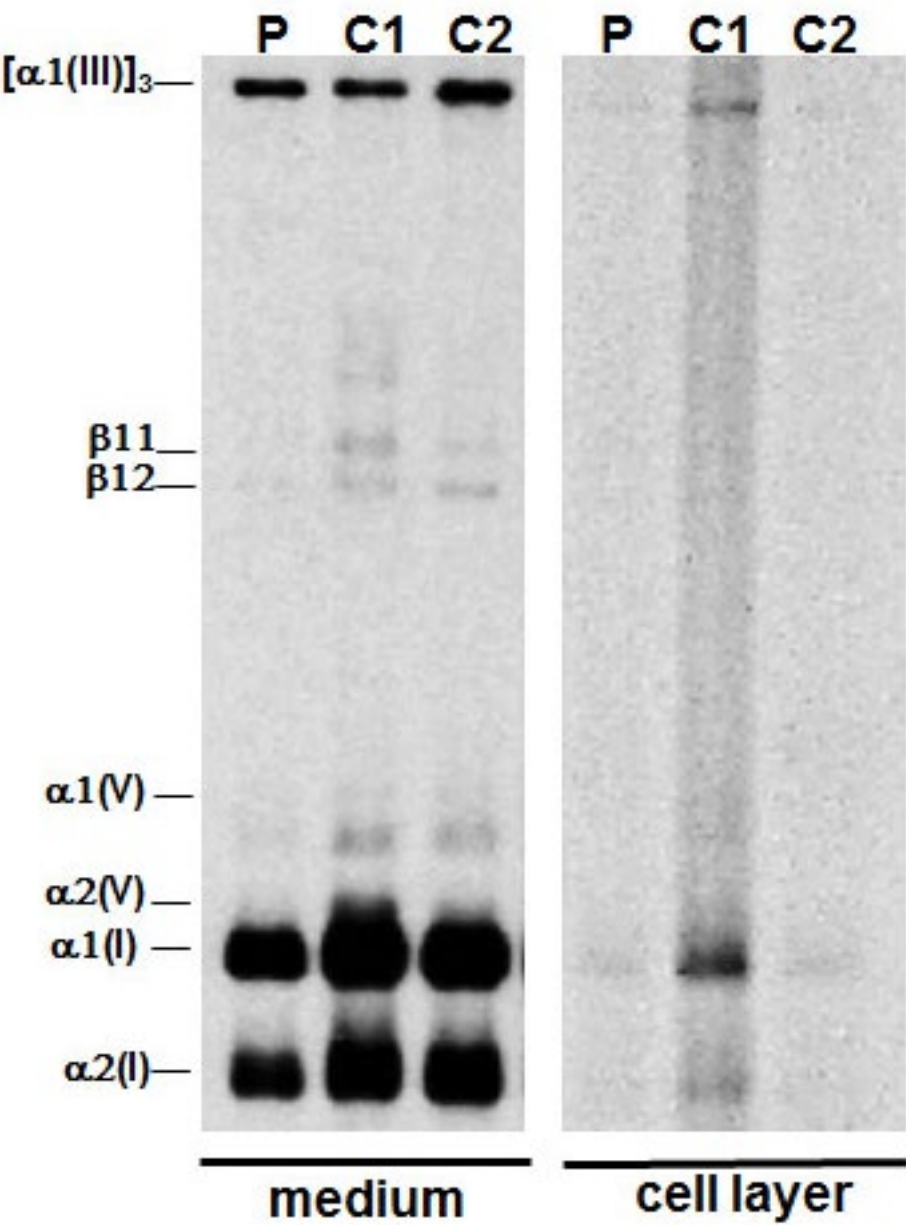

**Supplementary Table S1:** NGS panel for connective tissue disorders

|                  |              |               |              |                 |              |
|------------------|--------------|---------------|--------------|-----------------|--------------|
| <i>ABCC6</i>     | NM_001171    | <i>DSE</i>    | NM_013352    | <i>PPIB</i>     | NM_000942    |
| <i>ACTA2</i>     | NM_001613    | <i>DSPP</i>   | NM_014208    | <i>PRDM5</i>    | NM_016599    |
| <i>ACVRL1</i>    | NM_000020    | <i>EFEMP2</i> | NM_016938    | <i>PRKG1</i>    | NM_006258    |
| <i>ADAMTS2</i>   | NM_014244    | <i>ELN</i>    | NM_000501    | <i>PYCR1</i>    | NM_006907    |
| <i>ADAMTS4</i>   | NM_019032    | <i>ENG</i>    | NM_000118    | <i>RIN2</i>     | NM_001242581 |
| <i>ALDH18A1</i>  | NM_002860    | <i>FBLN5</i>  | NM_006329    | <i>RUNX2</i>    | NM_001024630 |
| <i>ALPL</i>      | NM_000478    | <i>FBN1</i>   | NM_000138    | <i>RYR1</i>     | NM_000540    |
| <i>ANO5</i>      | NM_213599    | <i>FBN2</i>   | NM_001999    | <i>SEC24D</i>   | NM_014822    |
| <i>ATP6V0A2</i>  | NM_012463    | <i>FGFR2</i>  | NM_000141    | <i>SEPN1</i>    | NM_020451    |
| <i>ATP7A</i>     | NM_000052    | <i>FGFR3</i>  | NM_001163213 | <i>SERPINF1</i> | NM_002615    |
| <i>B3GALT6</i>   | NM_080605    | <i>FKBP10</i> | NM_0213939   | <i>SERPINH1</i> | NM_001235    |
| <i>B4GALT7</i>   | NM_007255    | <i>FKBP14</i> | NM_017946    | <i>SKI</i>      | NM_003036    |
| <i>BMP1</i>      | NM_006129    | <i>FLCN</i>   | NM_144997    | <i>SLC25A2</i>  | NM_000112    |
| <i>CASR</i>      | NM_001178065 | <i>FLNA</i>   | NM_001456    | <i>SLC2A10</i>  | NM_030777    |
| <i>CBS</i>       | NM_000071    | <i>GLA</i>    | NM_000169    | <i>SLC39A13</i> | NM_001128225 |
| <i>CHRD1</i>     | NM_001143981 | <i>GORAB</i>  | NM_152281    | <i>SMAD3</i>    | NM_005902    |
| <i>CHST14</i>    | NM_130468    | <i>IFITM5</i> | NM_001025295 | <i>SMAD4</i>    | NM_005359    |
| <i>COL11A1</i>   | NM_001854    | <i>LEPRE1</i> | NM_001243246 | <i>SOX9</i>     | NM_000346    |
| <i>(COL11A2)</i> | NM_080680    | <i>LRP5</i>   | NM_002335    | <i>SP7</i>      | NM_001173467 |
| <i>COL12A1</i>   | NM_004370    | <i>LTBP2</i>  | NM_000428    | <i>SPARC</i>    | NM_003118    |
| <i>COL1A1</i>    | NM_000088    | <i>LTBP4</i>  | NM_0035732   | <i>STAT1</i>    | NM_007315    |
| <i>COL1A2</i>    | NM_000069    | <i>MAT2A</i>  | NM_005911    | <i>STAT3</i>    | NM_139278    |
| <i>COL2A1</i>    | NM_001844    | <i>MED12</i>  | NM_005120    | <i>TGFB1</i>    | NM_000660    |
| <i>COL3A1</i>    | NM_000090    | <i>MFAP5</i>  | NM_003480    | <i>TGFB2</i>    | NM_001135599 |
| <i>COL5A1</i>    | NM_000093    | <i>MMP2</i>   | NM_004530    | <i>TGFB3</i>    | NM_003239    |
| <i>COL5A2</i>    | NM_000393    | <i>MYH11</i>  | NM_002474    | <i>TGFBR1</i>   | NM_004612    |
| <i>COL6A1</i>    | NM_001846    | <i>MYLK</i>   | NM_053025    | <i>TGFBR2</i>   | NM_001024847 |
| <i>COL6A2</i>    | NM_001849    | <i>NOTCH1</i> | NM_017617    | <i>TMEM38B</i>  | NM_018112    |
| <i>COL6A3</i>    | NM_004369    | <i>NOTCH3</i> | NM_000435    | <i>TRIP11</i>   | NM_004239    |
| <i>COL9A1</i>    | NM_001851    | <i>P4HB</i>   | NM_000918    | <i>WNT1</i>     | NM_005430    |
| <i>COL9A2</i>    | NM_001852    | <i>PLOD1</i>  | NM_000302    | <i>XYLT1</i>    | NM_022166    |
| <i>CREB3L1</i>   | NM_052854    | <i>PLOD2</i>  | NM_182943    | <i>XYLT2</i>    | NM_022167    |
| <i>CRTAP</i>     | NM_006371    | <i>PLOD3</i>  | NM_001084    | <i>ZDHHC9</i>   | NM_018032    |
| <i>DCHS1</i>     | NM_003737    | <i>PLS3</i>   | NM_005032    | <i>ZNF469</i>   | NM_001127464 |

Supplementary Table S2

| Primers and PCR conditions for <i>TNXB</i> (NM_0019105.7) Sanger sequencing                   |                        |                                                  |
|-----------------------------------------------------------------------------------------------|------------------------|--------------------------------------------------|
| Exons 2-31 PCR: 95 °C, 3'; 95 °C, 30"; 58 °C, 20"; 72 °C, 45"; 72 °C, 7'; 10 °C, ∞; 32 cycles |                        |                                                  |
| Exon 2                                                                                        | TNxBex2aF<br>TNxBex2aR | GATTACTTGTGGGTGGTGGG<br>TACCTCTGAAGCAAGGACTGG    |
|                                                                                               | TNxBex2bF<br>TNxBex2bR | AAGCCCTCTTCTCAGCTTT<br>GGCTCAGATCAAAACACACCA     |
| Exon 3                                                                                        | TNxBex3aF<br>TNxBex3aR | GAGCAGACATGGCCTTATGA<br>CTCATGCCACAGTCGTCAC      |
|                                                                                               | TNxBex3bF<br>TNxBex3bR | AATGATCAGGGTCGCTGTG<br>CGCAATCGGTTCCAGTGTA       |
|                                                                                               | TNxBex3cF<br>TNxBex3cR | GGCGAGGACTGTGGTACG<br>CCTGAGTAGCCTGCGTCAC        |
|                                                                                               | TNxBex3dF<br>TNxBex3dR | GAGAACGGCGTGTGTGTTT<br>ACAGGCACACTCCTTGAC        |
|                                                                                               | TNxBex3eF<br>TNxBex3eR | GCAGGCTACTCAGGGGAAG<br>TCCACTCTTCCTCAGGCTCA      |
|                                                                                               | TNxBex3fF<br>TNxBex3fR | GGGAGATTCTGTGCTCCTGA<br>GCCATCTGGACTCAACCAAT     |
| Exon 4                                                                                        | TNxBex4F<br>TNxBex4R   | GGGAGATTCTGTGCTCCTGA<br>GCCATCTGGACTCAACCAAT     |
| Exon 5                                                                                        | TNxBex5F<br>TNxBex5R   | GGACCTGTTTCGTAGGGTTG<br>ACTCAGGTGGGTGTCTGGTT     |
| Exon 6                                                                                        | TNxBex6F<br>TNxBex6R   | GCTCTTGGGAAGGAAAGATGATG<br>ACAGGACTCCAGGCATCTGA  |
| Exon 7                                                                                        | TNxBex7F<br>TNxBex7R   | CAGGTGAGGGAACCAGAAAGT<br>GCTGAACCTGCAATTCCTTT    |
| Exon 8                                                                                        | TNxBex8F<br>TNxBex8R   | GACCTGAAACCCCCGAAAGAT<br>ATGCCCTGTTCTCCAGCCAGAG  |
| Exon 9                                                                                        | TNxBex9F<br>TNxBex9R   | CAGTCCCTCTGTACTCCCTCA<br>ACTTCTGGGAAGCCTGACAC    |
| Exon 10                                                                                       | TNxBex10F<br>TNxBex10R | CCCAGAAAGTTTAGCACTCGAA<br>TGGCAAAATGAGCTGAGAAG   |
| Exon 11                                                                                       | TNxBex11F<br>TNxBex11R | GCTGTCTCAGCCTTCTCCAT<br>CAGCCTCAAGGTTCCACTG      |
| Exon 12                                                                                       | TNxBex12F<br>TNxBex12R | TTTACTAACAGCCCCCTACCA<br>GTCAGGGAACAGAAAGACTGG   |
| Exon 13                                                                                       | TNxBex13F<br>TNxBex13R | AACTATTCCCCATCTCAGTTCAC<br>TCAAATGAGACAGAGCAGGTG |
| Exon 14                                                                                       | TNxBex14F<br>TNxBex14R | GGAAATATTTGGGGAAGCAC<br>CTGGGGCCAAATAATGGTAAT    |
| Exon 15                                                                                       | TNxBex15F<br>TNxBex15R | GCTGCCATTACCATTATTGG<br>GGATGATCGAAAGCAGACAGT    |
| Exon 16                                                                                       | TNxBex16F<br>TNxBex16R | CTGGTCTTTCGATTGCTGACT<br>TGGAAGAGAGGACTGAGGTG    |
| Exon 17                                                                                       | TNxBex17F<br>TNxBex17R | TTCAGTGATGGGAAGCATGT<br>AGTGGTCAACCTCACAGGAAG    |
| Exon 18                                                                                       | TNxBex18F<br>TNxBex18R | GGCCTCTCTGAAGTACCTC<br>CTGGATTGCTCTCTGTCC        |
| Exon 19                                                                                       | TNxBex19F<br>TNxBex19R | TTGAGGGACCATAAGGAAGC<br>CTGGGGCAATACCAAAGTCT     |
| Exon 20                                                                                       | TNxBex20F<br>TNxBex20R | AGAGAATCCCAGAGTCCCTTG<br>AGTTCAGAGAGGCCATTCTT    |
| Exon 21                                                                                       | TNxBex21F<br>TNxBex21R | GGCCTCTCTGAAGTACCTC<br>GTGAAAGGGCACAGCAGTAA      |
| Exon 22                                                                                       | TNxBex22F<br>TNxBex22R | GGATACCTCACCAGGCTCTTA<br>TCTCCATGACATGTCTTTCCA   |
| Exon 23                                                                                       | TNxBex23aF             | CAATCCAGCAAATGAAGCAA                             |

|                                                                                                  |                                                                                                                                             |                                                 |
|--------------------------------------------------------------------------------------------------|---------------------------------------------------------------------------------------------------------------------------------------------|-------------------------------------------------|
|                                                                                                  | TNXBex23R                                                                                                                                   | CAGTCATCACCAAAGAGCAAG                           |
| Exon 24                                                                                          | TNXBex24F<br>TNXBex24R                                                                                                                      | AGCTGACCCTGGAACCTTGTC<br>TCTTAGCAAGATCCCCAAGC   |
| Exon 25                                                                                          | TNXBex25F<br>TNXBex25R                                                                                                                      | CTCTTGGGCACTTTGTGTTTT<br>CACCCAGGAAGATCTGTCAGT  |
| Exon 26                                                                                          | TNXBex26F<br>TNXBex26R                                                                                                                      | CCTCAGAGCTTGTCATGTGTG<br>AAGCCTGCTGAATCCAAATC   |
| Exon 27                                                                                          | TNXBex27F<br>TNXBex27R                                                                                                                      | CAGGGTGAGGGATAGGAAAG<br>ACCAAAGAGCAAGAGGTGG     |
| Exon 28                                                                                          | TNXBex28F<br>TNXBex28R                                                                                                                      | CCCAAGAATGGACTTCTCTGA<br>TGAGGCAGGATCATTAGCAA   |
| Exon 29                                                                                          | TNXBex29F<br>TNXBex29R                                                                                                                      | TCATATGTTGTGCGAGGGTTA<br>CAATAAATCAGTGGGTGCTGAG |
| Exon 30                                                                                          | TNXBex30F<br>TNXBex30R                                                                                                                      | AGGGGACACTTGCTTTCTTG<br>ACACAGAGGGACTCACTTTCCG  |
| Exon 31                                                                                          | TNXBex31F<br>TNXBex31R                                                                                                                      | GTTCTCCCTCATTCCTGTGG<br>CCTGCTCTGGACTCCTTGAT    |
| Exons 32-44                                                                                      | <i>Long-range PCR (5440 bp) as template for nested-PCR</i><br>95 °C, 4'; 95 °C, 30"; 60 °C, 30"; 72 °C, 5'; 72 °C, 10'; 10 °C, ∞; 30 cycles |                                                 |
|                                                                                                  | Intr30F                                                                                                                                     | GTGGCCTTGTCAGATAGC                              |
|                                                                                                  | 3'UTR-R                                                                                                                                     | ACAGCCCGGGCCAGAG                                |
| <i>Nested-PCR: 95 °C, 3'; 95 °C, 30"; 58 °C, 20"; 72 °C, 45"; 72 °C, 7'; 10 °C, ∞; 32 cycles</i> |                                                                                                                                             |                                                 |
| Exon 32                                                                                          | TNXBex32F<br>TNXBex32R                                                                                                                      | GACTGGGCCTGGACCTATAA<br>AGCCCATCCATCCTCTCTC     |
| Exon 33                                                                                          | TNXBex33F<br>TNXBex33R                                                                                                                      | TGCAAGTCCCTGGTTACAGA<br>AAGTCGCTCTGCAGATTCTT    |
| Exons 34-37                                                                                      | TNXBex33F<br>TNXBex37R                                                                                                                      | CTGACACTGTATGGGCTGCG<br>CACAGACCCTACCTGTGGTG    |
| Exons 37-38                                                                                      | TNXBex37F<br>TNXBex38R                                                                                                                      | TTGTCCTCCACCAACTACA<br>ATCTCCTGTGGGACAGACAAG    |
| Exons 39-41                                                                                      | TNXBex38F<br>TNXBex41R                                                                                                                      | TACCTGCTCAGCTTCCACAC<br>TCACAGCCTCTGCTTACCTG    |
| Exon 42                                                                                          | TNXBex42F<br>TNXBex42R                                                                                                                      | GCATGGATGGACAGACAGAC<br>GCGTAGTGGCAGTTCTGTGA    |
| Exon 43                                                                                          | TNXBex43F<br>TNXBex43R                                                                                                                      | CTCGGCTGCGGAGTACTACC<br>ACACTGTGGGGCTGAAACCT    |
| Exon 44                                                                                          | TNXBex44F<br>TNXBex44R                                                                                                                      | GAGGGAGCTGGAGTTGATTTA<br>ACTGCAGTGTATCCTCAAGA   |

**Supplementary Table S3:** Published *TNXB* pathogenic variants

| Patient | Family | Sex | Age (years)     | Cons. | Status                | Allele 1                                    | Type           | Allele 2                                    | Type           | References                            |
|---------|--------|-----|-----------------|-------|-----------------------|---------------------------------------------|----------------|---------------------------------------------|----------------|---------------------------------------|
| P1      | I      | F   | 43              | +     | Homozygous            | Exon 15: c.5362del, p.(Thr1788Profs*100)    | Frameshift-PTC | Exon 15: c.5362del, p.(Thr1788Profs*100)    | Frameshift-PTC | This report                           |
| P2      | II     | F   | 69              | -     | Homozygous            | Exon 8: c.3290_3291del, p.(Lys1097Argfs*48) | Frameshift-PTC | Exon 8: c.3290_3291del, p.(Lys1097Argfs*48) | Frameshift-PTC | Schalkwijk <i>et al.</i> , 2001       |
| P3      |        | F   | 59              |       |                       |                                             |                |                                             |                |                                       |
| P4      | III    | F   | 60              | -     | Compound heterozygous | TNXA conversion <sup>a</sup>                | Frameshift-PTC | TNXA conversion <sup>a</sup>                | Frameshift-PTC |                                       |
| P5      |        | F   | 55              |       |                       |                                             |                |                                             |                |                                       |
| P6      |        | M   | 59              |       |                       |                                             |                |                                             |                |                                       |
| P7      | IV     | M   | 57 <sup>+</sup> | -     | Homozygous            | Exon 3: c.2117_2118insGT p.(Glu707*)        | Frameshift-PTC | Exon 3: c.2117_2118insGT p.(Glu707*)        | Frameshift-PTC |                                       |
| P8      | V      | F   | 49 <sup>+</sup> | -     | Homozygous            | Exon 8: c.3290_3291del, p.(Lys1097Argfs*48) | Frameshift-PTC | Exon 8: c.3290_3291del, p.(Lys1097Argfs*48) | Frameshift-PTC |                                       |
| P9      | VI     | M   | 36              | -     | Compound heterozygous | TNXB/TNXA fusion <sup>b</sup>               | Frameshift-PTC | TNXA conversion <sup>b</sup>                | Frameshift-PTC |                                       |
| P10     | VII    | F   | 32              | -     | Compound heterozygous | Exon 3: c.903del, p.(Tyr301*)               | Nonsense       | Exon 42: c.12464-1G>A                       | Splicing       |                                       |
| P11     |        | F   | 31              |       |                       |                                             |                |                                             |                |                                       |
| P12     | VIII   | M   | 29              | +     | Homozygous            | Exon 8: c.3290_3291del, p.(Lys1097Argfs*48) | Frameshift-PTC | Exon 8: c.3290_3291del, p.(Lys1097Argfs*48) | Frameshift-PTC |                                       |
| P13     | IX     | F   | 27              | -     | Compound heterozygous | Exon 8: c.3290_3291del, p.(Lys1097Argfs*48) | Frameshift-PTC | TNXB/TNXA fusion <sup>c</sup>               | Frameshift-PTC | Hendriks <i>et al.</i> , 2012         |
| P14     | X      | F   | 12              | -     | Compound heterozygous | TNXB/TNXA fusion <sup>d</sup>               | Frameshift-PTC | TNXA conversion <sup>d</sup>                | Frameshift-PTC |                                       |
| P15     | XI     | M   | 42              | -     | Compound heterozygous | TNXB/TNXA fusion <sup>e</sup>               | Frameshift-PTC | Exon 41: c.12214C>T, p.(Arg4072Cys)         | Missense       | Pénisson-Besnier <i>et al.</i> , 2013 |
| P16     | XII    | F   | 45              | -     | Compound heterozygous | Exon 6: c.2539C>T, p.(Arg847*)              | Nonsense       | Exon 9: c.3574C>T, p.(Gln1192*)             | Nonsense       | Sakiyama <i>et al.</i> , 2015         |
| P17     | XIII   | M   | 13              | -     | Compound heterozygous | Exon 9 : c.3637G>A, p.(Val1213Ile)          | Missense       | Exon 22: c.7774G>A, p.(Gly2592Ser)          | Missense       | Mackenroth <i>et al.</i> , 2016       |
| P18     | XIV    | F   | 48              | -     | Compound heterozygous | Exon 43: c.12553C>T, p.(Arg4185*)           | Nonsense       | Exon 6: c.2590C>T, p.(Gln864*)              | Nonsense       | Demirdas <i>et al.</i> , 2017         |
| P19     | XV     | F   | 23              | -     | Compound heterozygous | Exon 6: c.2590C>T, p.(Gln864*)              | Nonsense       | TNXB/TNXA fusion <sup>f</sup>               | Frameshift-PTC |                                       |

|            |      |   |    |   |              |                           |                |                                     |                |
|------------|------|---|----|---|--------------|---------------------------|----------------|-------------------------------------|----------------|
| <b>P20</b> | XVI  | M | 16 | - | Compound     | Exon 5: c.2461C>T,        | Nonsense       | <i>TNXA</i> conversion <sup>§</sup> | Frameshift-PTC |
| <b>P21</b> |      | M | 14 | - | heterozygous | p.(Arg821)*               |                |                                     |                |
| <b>P22</b> | XVII | F | 12 | - | Compound     | Exon 2: c.107_108delinsA, | Frameshift-PTC | Exon 22: c.7826-1G>C                | Splicing       |
| <b>P23</b> |      | M | 6  | - | heterozygous | p.(Ala36Aspfs*68)         |                |                                     |                |

Note: Exons and mutations numbering are based on transcript NM\_019105.6; NP\_061978.6; cons. Consanguinity; † patient died. PTC: Premature termination codon.

<sup>a</sup> Patients 4, 5, and 6 were compound heterozygous for the 120 bp deletion [c.11435\_11524+30del, p.(Gly3812Phefs\*11)] and the “*TNXA*-derived” missense variant [c.12174C>G, p.(Cys4058Trp)], probably due to gene conversion in both alleles;

<sup>b</sup> Patient 9 was compound heterozygous for a *TNXB/TNXA* fusion gene in one allele, characterized by the *TNXA*-derived variations: 120bp deletion [c.11435\_11524+30del, p.(Gly3812Phefs\*11)] and [c.12174C>G, p.(Cys4058Trp)], and a gene conversion in the other allele, characterized by the 120 bp deletion [c.11435\_11524+30del, p.(Gly3812Phefs\*11)];

<sup>c</sup> Patient 13 was compound heterozygous for a recurrent frameshift deletion in exon 8 in one allele, and a *TNXB/TNXA* fusion gene characterized by the *TNXA*-derived variations: 120 bp deletion [c.11435\_11524+30del, p.(Gly3812Phefs\*11)] and missense variant [c.12174C>G, p.(Cys4058Trp)];

<sup>d</sup> Patient 14 was compound heterozygous for a gene conversion in one allele and a *TNXB/TNXA* fusion gene in other allele, characterized both by the “*TNXA*-derived” missense variant [c.12174C>G, p.(Cys4058Trp)];

<sup>e</sup> Patient 15 was compound heterozygous for a *TNXB/TNXA* fusion gene in one allele characterized by the 120 bp deletion [c.11435\_11524+30del, p.(Gly3812Phefs\*11)], and a missense variant in the other allele;

<sup>f</sup> Patient 18 was compound heterozygous for a nonsense variant and a *TNXB/TNXA* fusion gene characterized by the *TNXA*-derived variations: 120 bp deletion [c.11435\_11524+30del, p.(Gly3812Phefs\*11)], and missense variant [c.12174C>G, p.(Cys4058Trp)];

<sup>§</sup> Patients 19 and 20 were compound heterozygous for a nonsense variant in one allele and a gene conversion in the other allele, characterized by the 120 bp deletion [c.11435\_11524+30del, p.(Gly3812Phefs\*11)].
